# Supplementary material for: miR-564 acts as a dual inhibitor of PI3K and MAPK signaling networks and inhibits proliferation and invasion in breast cancer
Source: PubMed Central journal article supplement (PMC5013276; doi:10.1038/srep32541), 2016-09-07
Supplement: srep32541-s1.pdf [file srep32541-s1.pdf]

## **miR-564 acts as a dual inhibitor of PI3K and MAPK signaling networks and inhibits proliferation and invasion in breast cancer**

Merve Mutlu<sup>1#</sup>, Özge Saatci<sup>1#</sup>, Suhail A. Ansari<sup>1</sup>, Emre Yurdusev<sup>1</sup>, Huma Shehwana<sup>1</sup>, Özlen Konu<sup>1</sup>, Umar Raza<sup>1</sup>, Özgür Şahin<sup>1\*</sup>.

<sup>1</sup>Department of Molecular Biology and Genetics, Faculty of Science, Bilkent University, 06800 Ankara, Turkey

<sup>#</sup>These authors contributed equally to this work.

### **SUPPLEMENTARY INFORMATION**

#### **Supplementary Figures**

Supplementary Figure 1. The effects of overexpression of two potential tumor suppressor miRNAs on cell viability.

Supplementary Figure 2. miR-564 target(s) selection based on dual inhibition of PI3K and MAPK pathways.

Supplementary Figure 3. Expression level of individual targets in cancer cell lines.

Supplementary Figure 4. Correlation of miR-564 expression with tumor progression and metastasis in patients with different types of cancers.

Supplementary Figure 5. Survival of breast cancer patients based on expression of individual miR-564 targets.

Supplementary Figure 6. Full-length blots of phospho-Akt (Thr308) and phospho-ERK1/2 proteins with low and high exposures for Figure 1C and 3D.

#### **Supplementary Tables**

Supplementary Table 1. List of potential tumor suppressor miRNAs selected according to their effects on PI3K and MAPK pathways as well as cell cycle proteins.

Supplementary Table 2. List of siRNAs, miRNA mimics and hairpin inhibitors.

Supplementary Table 3. List of primers used for qRT-PCR and cloning of 3'-UTRs.

Supplementary Table 4. List of antibodies used in Western blot experiments.

A

MDA-MB-231

MCF-7

BT-474

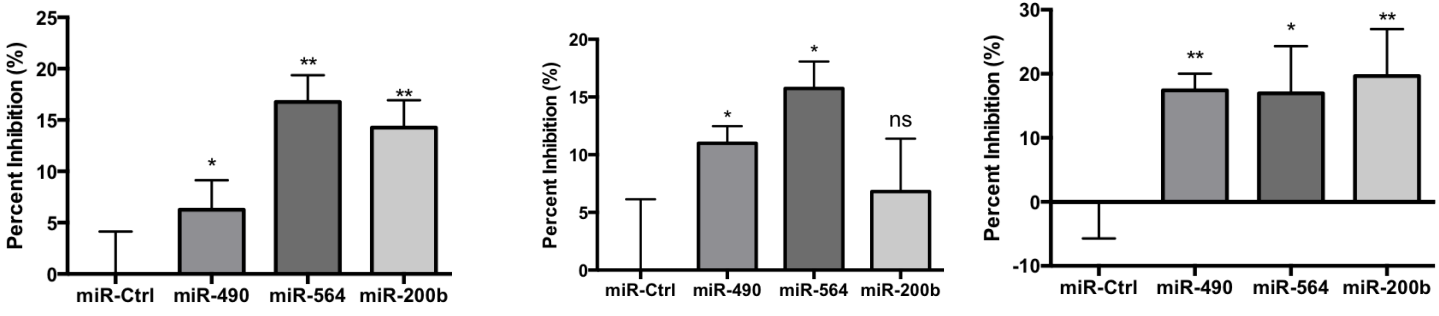

B

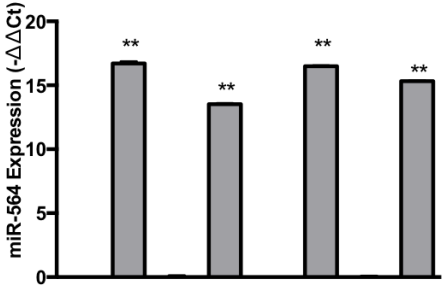

cell line: MDA-MB-231 MCF-7 MDA-MB-436 MDA-MB-231  
 transfection method: Transient Transient Transient Stable

**Supplementary Figure 1. The effects of overexpression of two potential tumor suppressor miRNAs on cell viability.**(A) Cell viability assay was done upon overexpression of miR-564 or miR-490 in MDA-MB-231, MCF-7 and BT474 breast cancer cell lines. miR-200b transfected cells were used as a positive control. (B) Expression fold changes of ectopically expressed miR-564 in MDA-MB-231, MCF-7 and MDA-MB-436, together with miR-564 expression in stably transfected MDA-MB-231 cell line.

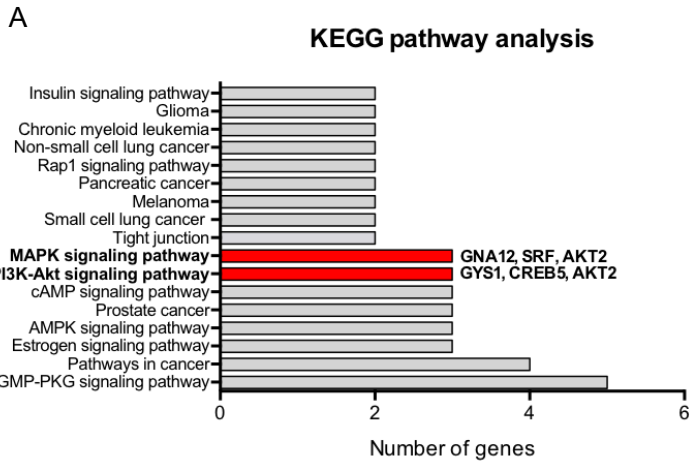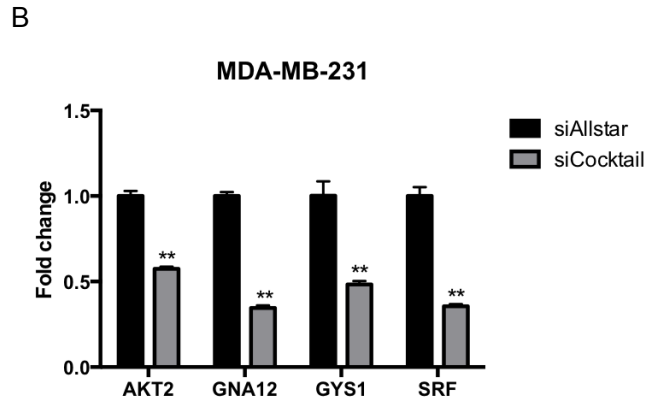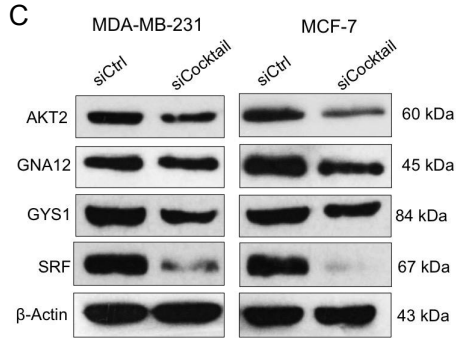

**Supplementary Figure 2. miR-564 target(s) selection based on dual inhibition of PI3K and MAPK pathways. (A)** KEGG pathway analysis of miR-564 targets selected from 4 different target prediction algorithms. Genes that are linked with PI3K and MAPK pathways were selected for further experimental analysis. **(B)** qRT-PCR validation for downregulation of four target genes at mRNA level upon siCocktail transfections. **(C)** Western blot validation for downregulation of four target genes at protein level upon siCocktail transfection.

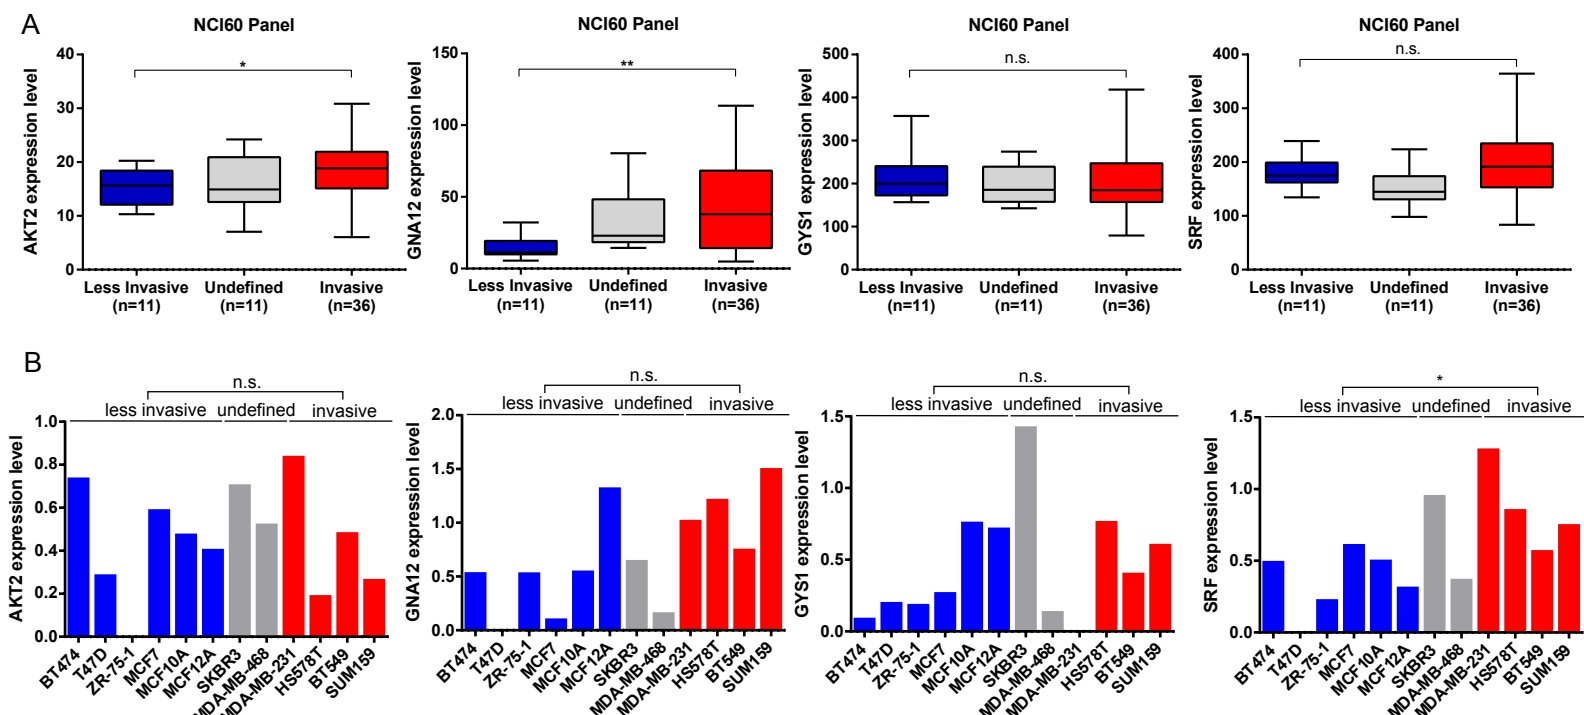

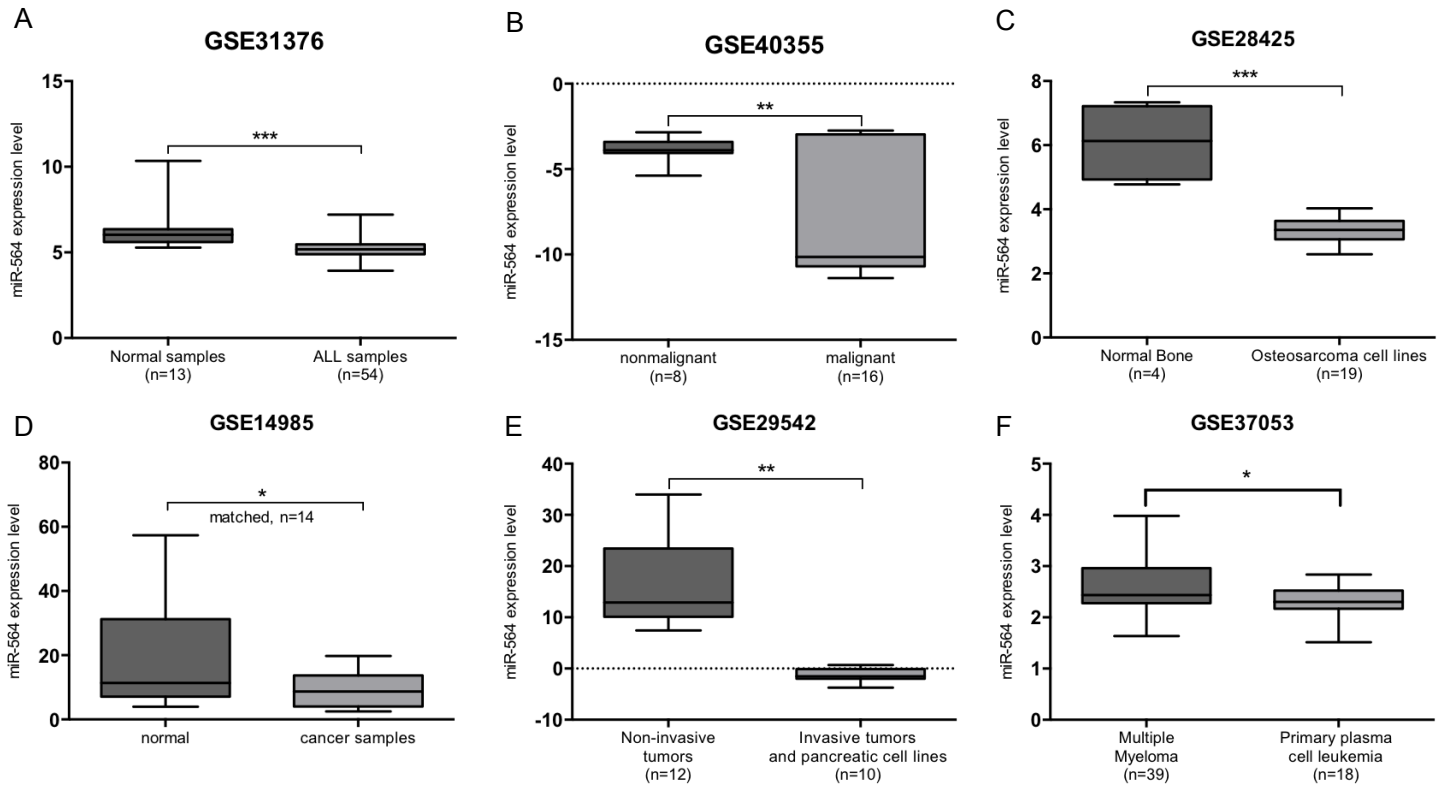

**Supplementary Figure 4. Correlation of miR-564 expression with tumor progression and metastasis in patients with different types of cancers.** (A) miR-564 expression levels in patients from GSE31376 dataset representing 13 normal and 54 ALL tumor samples. (B) miR-564 expression levels in non-malignant bladder cancer samples in patients from GSE40355 dataset. (C) miR-564 expression analysis in osteosarcoma cell lines compared to normal bone cell lines (GSE28425). (D) Analysis of miR-564 expression in 14 normal-tumor matched patient samples with lung, breast, prostate, colon, ovary cancer and lymphoma from GSE14985 dataset. Replicates in dataset were averaged. (E) Expression analysis of miR-564 level in bladder cancer types from GSE29542 dataset. (F) miR-564 expression levels in multiple myeloma and primary plasma cell leukemia from GSE37053 dataset.

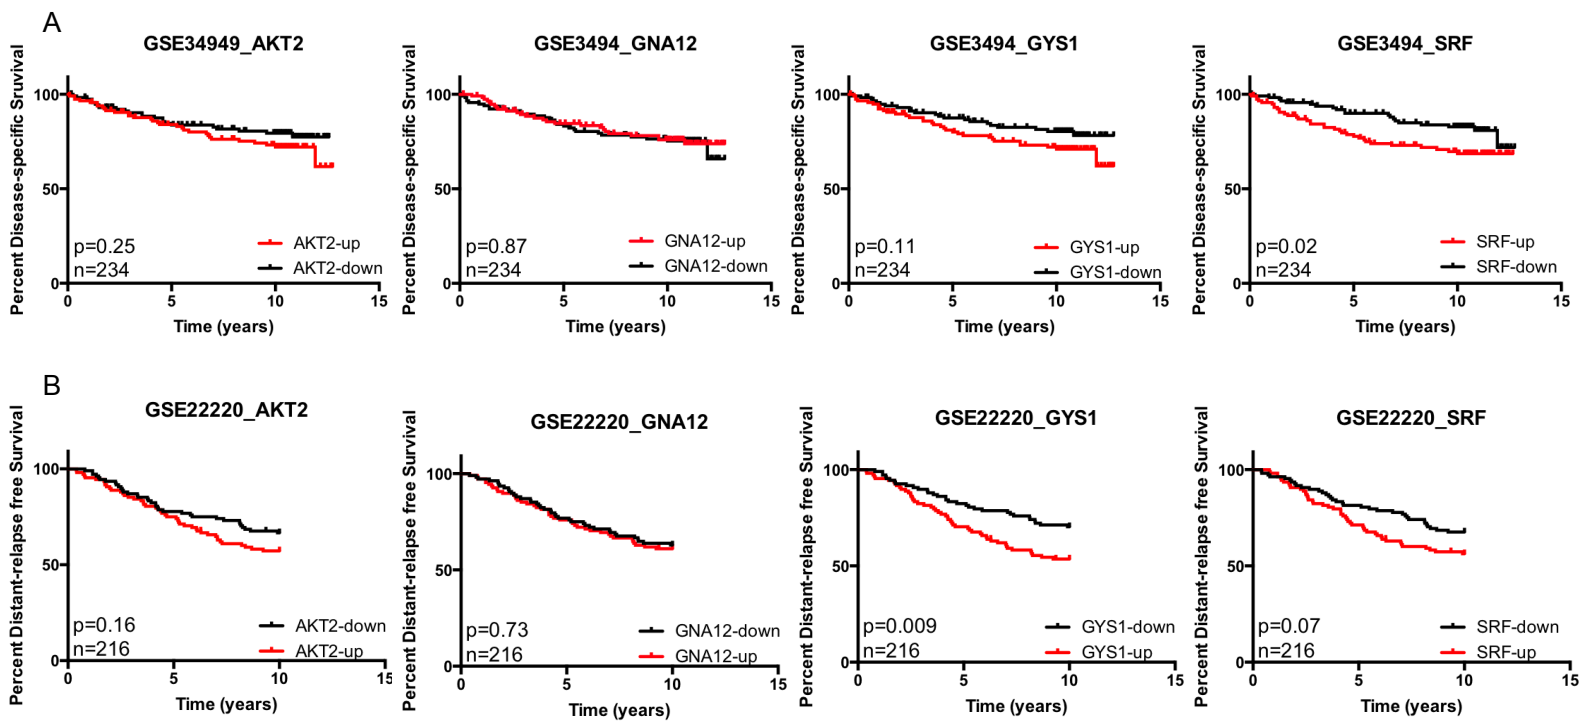

**Supplementary Figure 5. Survival of breast cancer patients based on expression of individual miR-564 targets. (A)** Survival analysis of breast cancer patients from GSE3494 dataset in relation to mRNA expression levels of miR-564 targets individually (n=234). **(B)** Graph showing survival correlations of breast cancer patients from GSE22220 dataset with mRNA level of individual miR-564 targets (n=216). Distant-relapse free survivals of patients were assessed with regard to high vs. low mRNA expressions.

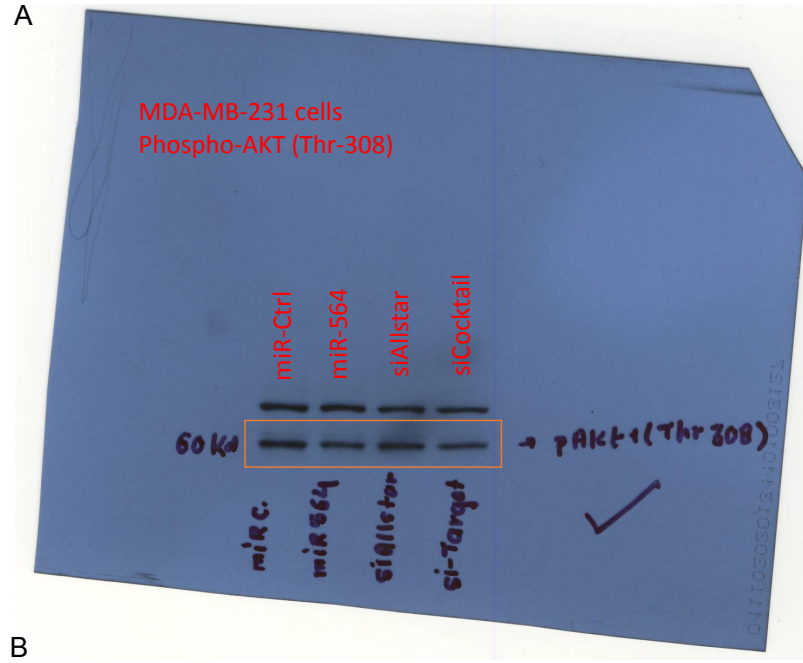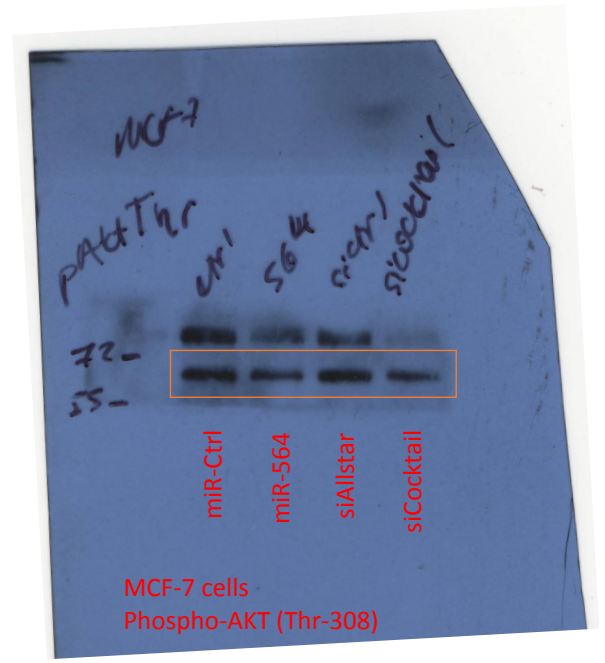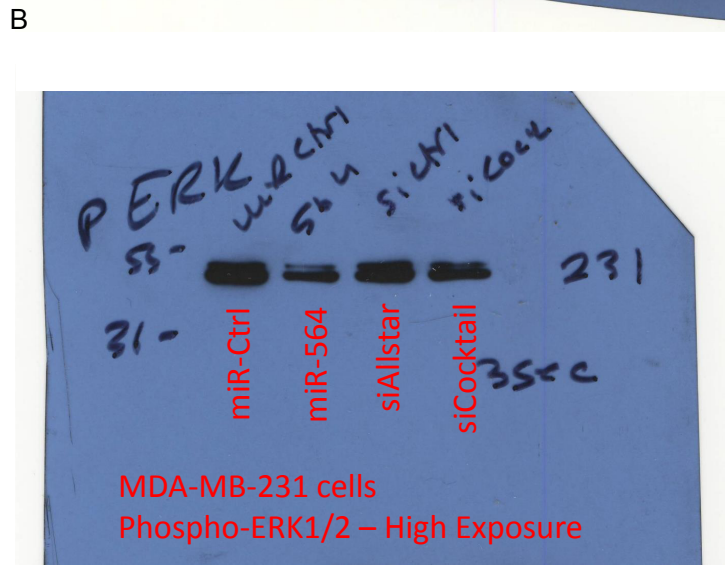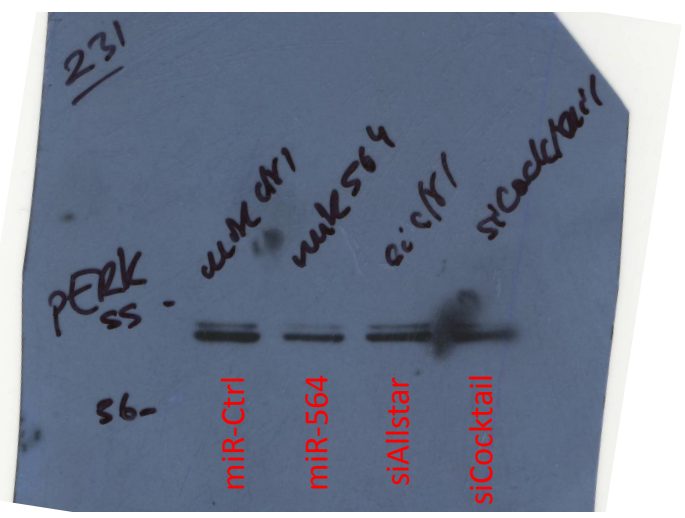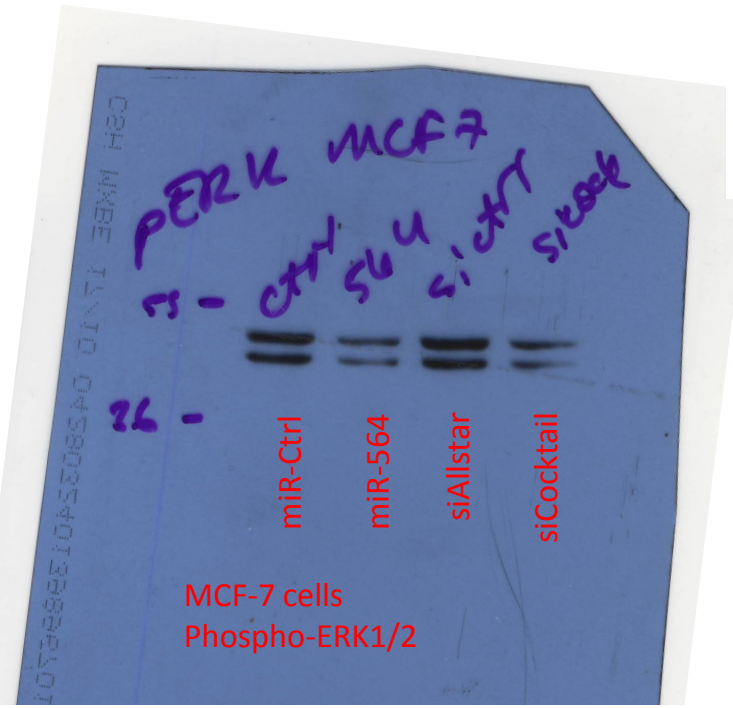

**Supplementary Figure 6. Full-length blots of phospho-Akt (Thr308) and phospho-ERK1/2 proteins with low and high exposures for Figure 1C and 3D. (A) phospho-Akt (Thr308) western blots of MDA-MB-231 (left) and MCF-7 (right) cells transfected with miR-564 or siCocktail. (B) phospho-ERK1/2 western blots of MDA-MB-231 (top) and MCF-7 (bottom) cells transfected with miR-564 or siCocktail.**

**Supplementary Table 1.** List of potential tumor suppressor miRNAs selected according to their effects on PI3K and MAPK pathways as well as cell cycle proteins.

| Potential tumor suppressor miRNAs | Heatmap Correlation scores (cut off: -0.5) |
|-----------------------------------|--------------------------------------------|
| hsa-miR-770-5p                    | -0.738                                     |
| hsa-miR-323-5p                    | -0.688                                     |
| hsa-miR-486-3p                    | -0.660                                     |
| hsa-miR-96                        | -0.656                                     |
| hsa-miR-206                       | -0.642                                     |
| hsa-miR-886-3p                    | -0.623                                     |
| hsa-miR-885-3p                    | -0.620                                     |
| hsa-miR-223                       | -0.577                                     |
| hsa-miR-634                       | -0.557                                     |
| hsa-miR-182*                      | -0.545                                     |
| hsa-miR-18a                       | -0.545                                     |
| hsa-miR-129*                      | -0.541                                     |
| hsa-miR-613                       | -0.539                                     |
| hsa-miR-149*                      | -0.533                                     |
| hsa-miR-512-3p                    | -0.529                                     |
| hsa-miR-668                       | -0.522                                     |
| <b>hsa-miR-564</b>                | -0.520                                     |
| hsa-miR-16                        | -0.517                                     |
| hsa-miR-296                       | -0.516                                     |
| hsa-miR-219-1-3p                  | -0.513                                     |
| hsa-miR-452*                      | -0.513                                     |
| hsa-miR-490                       | -0.505                                     |
| hsa-miR-548b-5p                   | -0.502                                     |



**Supplementary Table 2.** List of siRNAs, miRNA mimics and hairpin inhibitors.

| <b>siRNAs</b>           | <b>Catalog number</b> | <b>Firm</b> |
|-------------------------|-----------------------|-------------|
| AKT2                    | D-003001-05           | Dharmacon   |
| AKT2                    | D-003001-21           | Dharmacon   |
| AKT2                    | D-003001-07           | Dharmacon   |
| AKT2                    | D-003001-08           | Dharmacon   |
| GNA12                   | D-008435-01           | Dharmacon   |
| GNA12                   | D-008435-02           | Dharmacon   |
| GNA12                   | D-008435-03           | Dharmacon   |
| GNA12                   | D-008435-04           | Dharmacon   |
| GYS1                    | D-017726-01           | Dharmacon   |
| GYS1                    | D-017726-02           | Dharmacon   |
| GYS1                    | D-017726-03           | Dharmacon   |
| GYS1                    | D-017726-04           | Dharmacon   |
| SRF                     | D-009800-01           | Dharmacon   |
| SRF                     | D-009800-03           | Dharmacon   |
| SRF                     | D-009800-05           | Dharmacon   |
| SRF                     | D-009800-06           | Dharmacon   |
| <b>miRNA mimics</b>     |                       |             |
| miR-Ctrl                | CN-001000-01-05       | Dharmacon   |
| miR-564                 | C-300882-01           | Dharmacon   |
| miR-490                 | C-300750-05           | Dharmacon   |
| miR-200b                | C-300582-07           | Dharmacon   |
| <b>miRNA inhibitors</b> |                       |             |
| Negative Inhibitor      | IN-001005-01-05       | Dharmacon   |
| miR-564 inhibitor       | IH-300882-03          | Dharmacon   |

**Supplementary Table 3.** List of primers used for RT-PCR and cloning of 3'UTRs.

| qPCR primers           | Gene ID | Forward Primer                                                                | Reverse Primer                                                               |
|------------------------|---------|-------------------------------------------------------------------------------|------------------------------------------------------------------------------|
| CDH1                   | 999     | 5'-CCC GGGACAACGTTTATTAC-3'                                                   | 5'-GCTGGCTCAAGTCAAAGTCC-3'                                                   |
| ZO1                    | 7082    | 5'-CAGAGCCTTCTGATCATTCCA-3'                                                   | 5'-CATCTCTACTCCGGAGACTGC-3'                                                  |
| FN                     | 2335    | 5'-CTGGCCGAAAATACATTGTAAA-3'                                                  | 5'-CCACAGTCGGGTCAGGAG-3'                                                     |
| SNAI2                  | 6591    | 5'-TGGTTGCTTCAAGGACACAT-3'                                                    | 5'-GTTGCAGTGAGGGCAAGAA-3'                                                    |
| ZEB1                   | 6935    | 5'-GGGAGGAGCAGTGAAAGAGA-3'                                                    | 5'-TTTCTTGCCCTTCCTTTCTG-3'                                                   |
| ZEB2                   | 9839    | 5'-AAGCCAGGGACAGATCAGC-3'                                                     | 5'-CCACACTCTGTGCATTTGAACT-3'                                                 |
| AKT2                   | 208     | 5'-CCATGAATGAGGTGTCTGTC-3'                                                    | 5'-GGCCTCCAGGTCTTGATGTA-3'                                                   |
| GNA12                  | 2768    | 5'-TCAAGAAGCACTTCCCGGACTTCA-3'                                                | 5'-TTTCACAGCATGGAACACGAAGCG-3'                                               |
| GYS1                   | 2997    | 5'-CCGCTATGAGTTCTCCAACAAGG-3'                                                 | 5'-AGAAGGCAACCACTGTCTGCTC-3'                                                 |
| SRF                    | 6722    | 5'-AGCACAGACCTCACGCAGA-3'                                                     | 5'-GTTGTGGGCACGGATGAC-3'                                                     |
| CREB5                  | 9586    | 5'-CGTGCCTCCTTGAAACAAGCCATT-3'                                                | 5'-ATGAAACACCAGCACCTGCCTAGA-3'                                               |
| ACTB                   | 60      | 5'-CCAACCGCGAGAAGATGA-3'                                                      | 5'-CCAGAGGCGTACAGGGATAG-3'                                                   |
| HPRT                   | 3251    | 5'-TGACCTTGATTTATTTTGCATACC-3'                                                | 5'-CGAGCAAGACGTTTCAGTCCT-3'                                                  |
| <b>Cloning primers</b> |         |                                                                               |                                                                              |
| AKT2_3'UTR             |         | 5'-GCGCGCCTCGAGATGACAGCCTGGGCTTACT-3'                                         | 5'-GCGCGCGGGCCGCTACAGATGGATAGCTAGTTTATTACAG-3'                               |
| GNA12_3'UTR            |         | 5'-GGGTGTCTCGAGTCTGTGTGGTCCTTGAGTGG-3'                                        | 5'-GAAAGCGGGCCGCAGGTAGCTGGACAAGTGAGC-3'                                      |
| GYS1_3'UTR             |         | 5'-CTCCAGCCCTCGAGAGAGTGAGGACGAGGAGGAT-3'                                      | 5'-TCACACCCGGGGCCGCTCCCTCTCAACTGCAAAC-3'                                     |
| SRF_3'UTR              |         | 5'-CGGGAGCTCGAGCAACCTCACCGAGCTACAGG-3'                                        | 5'-CTGGGCGGGCCGCAATCTCCCCACACACTGG-3'                                        |
| AKT2_mut_3'UTR         |         | 5'-AAACCTGCCTGCCTCCAGCCACTTTCATT<br>ACTAGGGCTTCCTTCCAGCTGGCCTTACCT-3'         | 5'-AGGTAAGGCCAGCTGGAAGGAAGCCCTAGTAA<br>TGAAAGTGGCTGGGAGGCAGGCAGGTTT-3'       |
| GNA12_mut_3'UTR        |         | 5'-AAAGGGAGCACGTTGCCTTTTCAAACCTCAC<br>TTTCAGATTTCTAAGAGCCCCTAGTCCAA-3'        | 5'-TTGGACTAGGGGCTCTTAGGAAATCTGA<br>AAGTGAGTTTGAAAAGGCAACGTGCTCCCTTT-3'       |
| GYS1_mut_3'UTR         |         | 5'-TTTCCAAGTTCCTGCACTCCAGAATCCACAA<br>AGACTTTCATTTCTCTGGCTCCAGAATATGCATAAT-3' | 5'-ATTATGCATATTCTGGAGCCAGAGAAATGAAA<br>GTCTTTGTGGATTCTGGAGTGCAGGAACTTGAAA-3' |
| SRF_mut_3'UTR          |         | 5'-ATGTTTGCCATGAGTATTAGCTTACCCAATGG<br>GAACTTTCACCACCTCCCCACACACAGGCCTT-3'    | 5'-AAGGCCTGTGTGTGGGAGGTGGTGAAGTTC<br>CCATTGGGTAAGCTAATACTCATGGCAAACAT-3'     |

**Supplementary Table 4.** List of antibodies used in western blot experiments.

| <b>Gene Name</b>                  | <b>Firm</b>               | <b>Catalog Number</b> | <b>Dilution</b> |
|-----------------------------------|---------------------------|-----------------------|-----------------|
| phospho-AKT (Ser473)              | Cell Signaling Technology | CST4058               | 1:1000          |
| phospho-AKT (Thr308)              | Cell Signaling Technology | CST4056               | 1:1000          |
| total-AKT                         | Cell Signaling Technology | CST9272               | 1:1000          |
| phospho-ERK1/2<br>(Thr202/Tyr204) | Cell Signaling Technology | CST4376               | 1:1000          |
| ERK1/2                            | Cell Signaling Technology | CST4695               | 1:1000          |
| p27/Kip1                          | BD Biosciences            | 610241                | 1:1000          |
| p21                               | BD Biosciences            | 554228                | 1:1000          |
| CDK4                              | Epitomics                 | 2341-1                | 1:1000          |
| CDK2                              | Sigma Aldrich             | C5223                 | 1:1000          |
| phospho-Rb (Ser807/811)           | Cell Signaling Technology | CST8516               | 1:1000          |
| AKT2                              | Cell Signaling Technology | CST5239               | 1:1000          |
| GNA12                             | Santa Cruz                | sc-409                | 1:500           |
| GYS1                              | Cell Signaling Technology | CST3886               | 1:500           |
| SRF                               | Cell Signaling Technology | CST5147               | 1:500           |
| E-cadherin                        | Cell Signaling Technology | CST5296               | 1:1000          |
| ZO-1                              | Cell Signaling Technology | CST13663              | 1:1000          |
| N-cadherin                        | Santa Cruz                | sc-53488              | 1:1000          |
| Vimentin                          | Cell Signaling Technology | CST5741               | 1:1000          |
| Beta-actin                        | MP Biomedicals            | 69100                 | 1:5000          |
